# Supplementary material for: Expression Profile of MicroRNAs in Young Stroke Patients
Source: PubMed Central journal article supplement (PMC2765616; doi:10.1371/journal.pone.0007689), 2009-11-02
Supplement: pone.0007689.s001.pdf [file pone.0007689.s001.pdf]

| <i>anova</i>   |                 | Stroke |      | Stroke |      | LA    |      | LA   |      | CEmb  |      | CEmb  |      | SA   |      | UND   |      |       |      |       |      |       |      |
|----------------|-----------------|--------|------|--------|------|-------|------|------|------|-------|------|-------|------|------|------|-------|------|-------|------|-------|------|-------|------|
| <i>p</i> <0.05 | miRNA           | Stroke | ±SEM | mRS<2  | ±SEM | mRS>2 | ±SEM | LA   | ±SEM | mRS<2 | ±SEM | mRS>2 | ±SEM | CEmb | ±SEM | mRS<2 | ±SEM | mRS>2 | ±SEM | mRS<2 | ±SEM | mRS<2 | ±SEM |
| 1.01E-17       | hsa-let-7a      | 0.76   | 0.00 | 0.33   | 0.00 | 0.71  | 0.01 | 0.39 | 0.05 | 0.13  | 0.00 | 0.65  | 0.05 | 0.38 | 0.07 | 0.18  | 0.05 | 0.57  | 0.11 | 0.68  | 0.05 | 1.01  | 0.08 |
| 1.99E-12       | hsa-let-7b      | 1.23   | 0.02 | 0.58   | 0.02 | 1.30  | 0.03 | 0.51 | 0.09 | 0.27  | 0.01 | 0.75  | 0.12 | 0.87 | 0.16 | 0.51  | 0.01 | 1.23  | 0.23 | 1.13  | 0.01 | 1.12  | 0.03 |
| 3.07E-12       | hsa-let-7c      | 1.18   | 0.00 | 0.59   | 0.01 | 1.29  | 0.02 | 0.55 | 0.09 | 0.29  | 0.02 | 0.81  | 0.13 | 0.85 | 0.02 | 0.52  | 0.01 | 1.19  | 0.04 | 1.10  | 0.06 | 1.12  | 0.07 |
| 5.01E-13       | hsa-let-7d      | 0.75   | 0.03 | 0.39   | 0.00 | 0.82  | 0.05 | 0.46 | 0.14 | 0.16  | 0.03 | 0.76  | 0.16 | 0.42 | 0.03 | 0.19  | 0.01 | 0.64  | 0.03 | 0.70  | 0.00 | 1.08  | 0.18 |
| 1.93E-08       | hsa-let-7d*     | 1.59   | 0.00 | 0.67   | 0.03 | 1.68  | 0.01 | 0.77 | 0.06 | 0.36  | 0.04 | 1.18  | 0.09 | 1.21 | 0.02 | 0.83  | 0.01 | 1.59  | 0.03 | 1.02  | 0.01 | 0.86  | 0.03 |
| 8.89E-15       | hsa-let-7e      | 3.02   | 0.11 | 2.29   | 0.00 | 3.62  | 0.09 | 3.08 | 0.02 | 3.12  | 0.04 | 3.03  | 0.09 | 3.83 | 0.00 | 3.79  | 0.05 | 3.87  | 0.04 | 2.60  | 0.05 | 1.56  | 0.00 |
| 7.83E-18       | hsa-let-7f      | 0.69   | 0.05 | 0.30   | 0.06 | 0.70  | 0.07 | 0.45 | 0.08 | 0.15  | 0.07 | 0.75  | 0.08 | 0.37 | 0.09 | 0.20  | 0.09 | 0.54  | 0.10 | 0.60  | 0.08 | 0.97  | 0.07 |
| 2.83E-16       | hsa-let-7g      | 0.93   | 0.04 | 0.44   | 0.01 | 0.88  | 0.02 | 0.45 | 0.06 | 0.13  | 0.01 | 0.77  | 0.07 | 0.44 | 0.04 | 0.24  | 0.01 | 0.64  | 0.06 | 0.73  | 0.01 | 1.24  | 0.04 |
| 7.8E-15        | hsa-let-7i      | 0.91   | 0.04 | 0.44   | 0.06 | 0.84  | 0.03 | 0.49 | 0.05 | 0.12  | 0.10 | 0.86  | 0.08 | 0.44 | 0.02 | 0.20  | 0.09 | 0.67  | 0.05 | 0.83  | 0.04 | 1.33  | 0.05 |
| 8.52E-12       | hsa-miR-101     | 1.54   | 0.13 | 0.87   | 0.10 | 1.47  | 0.06 | 0.83 | 0.02 | 0.31  | 0.13 | 1.34  | 0.01 | 0.88 | 0.16 | 0.54  | 0.08 | 1.22  | 0.20 | 1.98  | 0.07 | 2.05  | 0.13 |
| 9.6E-12        | hsa-miR-103     | 1.31   | 0.00 | 0.82   | 0.01 | 1.40  | 0.04 | 0.84 | 0.11 | 0.27  | 0.05 | 1.41  | 0.13 | 0.93 | 0.05 | 0.64  | 0.01 | 1.21  | 0.07 | 1.64  | 0.03 | 1.43  | 0.18 |
| 1.15E-13       | hsa-miR-106a    | 1.49   | 0.12 | 1.02   | 0.09 | 1.51  | 0.14 | 0.84 | 0.09 | 0.22  | 0.08 | 1.45  | 0.10 | 0.84 | 0.14 | 0.50  | 0.12 | 1.18  | 0.15 | 1.77  | 0.13 | 1.82  | 0.17 |
| 2.07E-08       | hsa-miR-106b    | 1.42   | 0.14 | 0.90   | 0.16 | 1.51  | 0.13 | 0.77 | 0.16 | 0.23  | 0.12 | 1.31  | 0.17 | 1.02 | 0.08 | 0.68  | 0.10 | 1.35  | 0.06 | 1.77  | 0.15 | 1.39  | 0.24 |
| 1.72E-12       | hsa-miR-106b*   | 1.42   | 0.01 | 0.73   | 0.01 | 1.52  | 0.05 | 0.80 | 0.06 | 0.36  | 0.00 | 1.25  | 0.08 | 1.03 | 0.01 | 0.75  | 0.00 | 1.31  | 0.02 | 1.37  | 0.03 | 1.30  | 0.03 |
| 1.03E-13       | hsa-miR-107     | 1.17   | 0.05 | 0.64   | 0.01 | 1.22  | 0.01 | 0.76 | 0.06 | 0.22  | 0.08 | 1.30  | 0.06 | 0.72 | 0.07 | 0.51  | 0.04 | 0.92  | 0.08 | 1.37  | 0.03 | 1.29  | 0.11 |
| 1.93E-12       | hsa-miR-1184    | 3.09   | 0.04 | 1.78   | 0.08 | 2.18  | 0.02 | 1.36 | 0.03 | 1.19  | 0.08 | 1.53  | 0.02 | 1.92 | 0.06 | 1.33  | 0.05 | 2.51  | 0.11 | 3.11  | 0.01 | 2.21  | 0.06 |
| 9.7E-09        | hsa-miR-1246    | 1.66   | 0.00 | 1.44   | 0.01 | 1.68  | 0.00 | 1.78 | 0.05 | 2.25  | 0.09 | 1.29  | 0.03 | 2.09 | 0.05 | 2.07  | 0.00 | 2.10  | 0.09 | 1.29  | 0.05 | 1.67  | 0.08 |
| 7.53E-08       | hsa-miR-1255a   | 1.03   | 0.01 | 0.68   | 0.04 | 1.25  | 0.05 | 0.73 | 0.02 | 0.58  | 0.07 | 0.87  | 0.01 | 0.90 | 0.05 | 0.59  | 0.05 | 1.21  | 0.05 | 0.95  | 0.04 | 1.11  | 0.16 |
| 0.000725       | hsa-miR-1259    | 0.71   | 0.06 | 0.17   | 0.18 | 0.92  | 0.05 | 0.74 | 0.08 | 0.62  | 0.07 | 0.85  | 0.19 | 0.54 | 0.20 | 0.22  | 0.92 | 0.78  | 0.02 | 0.34  | 0.03 | 0.63  | 0.01 |
| 1.08E-20       | hsa-miR-125b-1* | 1.98   | 0.00 | 1.29   | 0.02 | 2.58  | 0.01 | 1.15 | 0.05 | 0.96  | 0.01 | 1.33  | 0.07 | 2.07 | 0.01 | 1.00  | 0.05 | 3.14  | 0.00 | 1.90  | 0.00 | 1.70  | 0.02 |
| 4.78E-11       | hsa-miR-126     | 0.79   | 0.02 | 0.31   | 0.01 | 0.75  | 0.05 | 0.50 | 0.07 | 0.16  | 0.02 | 0.84  | 0.08 | 0.37 | 0.03 | 0.20  | 0.01 | 0.53  | 0.05 | 0.71  | 0.05 | 0.92  | 0.14 |
| 1.46E-11       | hsa-miR-1261    | 3.95   | 0.07 | 1.81   | 0.04 | 5.52  | 0.05 | 1.67 | 0.06 | 1.51  | 0.06 | 1.83  | 0.06 | 4.02 | 0.02 | 1.35  | 0.21 | 6.65  | 0.07 | 2.87  | 0.07 | 3.08  | 0.08 |
| 7.8E-24        | hsa-miR-1264    | 1.53   | 0.05 | 1.03   | 0.03 | 1.87  | 0.07 | 1.03 | 0.02 | 0.32  | 0.05 | 1.74  | 0.03 | 1.21 | 0.01 | 0.76  | 0.03 | 1.65  | 0.01 | 1.64  | 0.00 | 1.49  | 0.02 |
| 1.14E-11       | hsa-miR-1265    | 1.36   | 0.07 | 0.75   | 0.06 | 1.20  | 0.08 | 0.99 | 0.06 | 0.70  | 0.03 | 1.28  | 0.08 | 1.00 | 0.09 | 0.80  | 0.05 | 1.20  | 0.13 | 1.13  | 0.04 | 1.18  | 0.07 |
| 1.05E-15       | hsa-miR-1275    | 3.06   | 0.04 | 2.27   | 0.02 | 3.01  | 0.02 | 1.44 | 0.05 | 1.63  | 0.03 | 1.24  | 0.07 | 2.71 | 0.06 | 2.51  | 0.04 | 2.91  | 0.08 | 2.32  | 0.04 | 3.36  | 0.03 |
| 2.75E-13       | hsa-miR-1280    | 1.99   | 0.03 | 1.67   | 0.04 | 2.14  | 0.00 | 1.10 | 0.05 | 0.96  | 0.01 | 1.24  | 0.08 | 1.72 | 0.05 | 1.47  | 0.02 | 1.98  | 0.07 | 2.22  | 0.01 | 2.09  | 0.04 |
| 3.56E-09       | hsa-miR-1284    | 1.01   | 0.02 | 0.59   | 0.13 | 1.07  | 0.06 | 0.66 | 0.01 | 0.48  | 0.05 | 0.84  | 0.04 | 0.66 | 0.08 | 0.37  | 0.24 | 0.95  | 0.03 | 0.84  | 0.05 | 0.94  | 0.03 |
| 5.14E-10       | hsa-miR-1285    | 1.87   | 0.06 | 1.22   | 0.06 | 1.68  | 0.07 | 1.34 | 0.01 | 1.54  | 0.00 | 1.14  | 0.03 | 1.37 | 0.02 | 1.04  | 0.02 | 1.70  | 0.03 | 1.30  | 0.04 | 1.39  | 0.01 |
| 6.98E-13       | hsa-miR-1290    | 2.01   | 0.03 | 1.70   | 0.04 | 1.98  | 0.02 | 2.14 | 0.01 | 2.71  | 0.01 | 1.57  | 0.05 | 2.27 | 0.05 | 2.20  | 0.05 | 2.33  | 0.05 | 1.37  | 0.01 | 2.27  | 0.01 |
| 2.97E-18       | hsa-miR-129-5p  | 1.73   | 0.13 | 1.13   | 0.11 | 2.07  | 0.11 | 1.00 | 0.14 | 0.93  | 0.13 | 1.07  | 0.14 | 1.95 | 0.12 | 1.00  | 0.16 | 2.89  | 0.11 | 1.52  | 0.13 | 1.54  | 0.10 |
| 3.09E-15       | hsa-miR-1308    | 1.03   | 0.02 | 0.57   | 0.02 | 0.98  | 0.03 | 0.90 | 0.05 | 0.77  | 0.02 | 1.03  | 0.07 | 0.75 | 0.03 | 0.64  | 0.03 | 0.86  | 0.03 | 0.63  | 0.02 | 0.67  | 0.02 |
| 4.13E-10       | hsa-miR-130a    | 1.56   | 0.06 | 0.80   | 0.09 | 1.64  | 0.10 | 0.99 | 0.09 | 0.30  | 0.09 | 1.69  | 0.09 | 0.92 | 0.00 | 0.62  | 0.04 | 1.21  | 0.03 | 1.70  | 0.12 | 1.35  | 0.04 |
| 3.37E-12       | hsa-miR-130b    | 1.78   | 0.07 | 1.17   | 0.04 | 1.90  | 0.05 | 0.89 | 0.00 | 0.30  | 0.10 | 1.47  | 0.02 | 1.35 | 0.04 | 1.06  | 0.04 | 1.65  | 0.04 | 2.33  | 0.07 | 1.84  | 0.03 |
| 7.06E-14       | hsa-miR-138-1*  | 1.20   | 0.02 | 0.94   | 0.01 | 1.20  | 0.06 | 0.93 | 0.01 | 0.35  | 0.00 | 1.51  | 0.01 | 0.98 | 0.09 | 0.66  | 0.00 | 1.29  | 0.13 | 1.43  | 0.05 | 1.20  | 0.04 |
| 8.23E-08       | hsa-miR-140-3p  | 1.29   | 0.02 | 0.76   | 0.06 | 1.20  | 0.03 | 0.72 | 0.02 | 0.29  | 0.01 | 1.15  | 0.03 | 0.89 | 0.04 | 0.73  | 0.06 | 1.05  | 0.11 | 1.12  | 0.04 | 0.99  | 0.02 |
| 1.74E-17       | hsa-miR-142-3p  | 0.59   | 0.02 | 0.28   | 0.01 | 0.69  | 0.01 | 0.43 | 0.08 | 0.18  | 0.03 | 0.68  | 0.10 | 0.37 | 0.03 | 0.15  | 0.03 | 0.60  | 0.05 | 0.70  | 0.01 | 0.86  | 0.06 |
| 1.4E-10        | hsa-miR-142-5p  | 1.42   | 0.02 | 0.86   | 0.02 | 1.32  | 0.02 | 0.80 | 0.13 | 0.27  | 0.02 | 1.32  | 0.15 | 0.85 | 0.10 | 0.55  | 0.01 | 1.14  | 0.15 | 1.24  | 0.01 | 1.54  | 0.01 |
| 3.74E-13       | hsa-miR-144     | 1.35   | 0.08 | 0.87   | 0.07 | 1.61  | 0.07 | 0.85 | 0.02 | 0.42  | 0.06 | 1.28  | 0.01 | 1.17 | 0.05 | 0.65  | 0.09 | 1.70  | 0.03 | 1.70  | 0.03 | 1.57  | 0.00 |

|          |                |      |      |      |      |      |      |      |      |      |      |      |      |      |      |      |      |      |      |      |      |      |      |
|----------|----------------|------|------|------|------|------|------|------|------|------|------|------|------|------|------|------|------|------|------|------|------|------|------|
| 1.73E-16 | hsa-miR-144*   | 0.69 | 0.06 | 1.30 | 0.04 | 0.71 | 0.05 | 0.60 | 0.06 | 0.06 | 0.02 | 1.14 | 0.06 | 0.32 | 0.09 | 0.05 | 0.01 | 0.59 | 0.10 | 1.07 | 0.05 | 1.43 | 0.07 |
| 3.15E-07 | hsa-miR-148b   | 1.24 | 0.04 | 0.70 | 0.01 | 1.24 | 0.04 | 0.56 | 0.17 | 0.16 | 0.01 | 0.95 | 0.20 | 0.77 | 0.05 | 0.50 | 0.03 | 1.04 | 0.09 | 0.91 | 0.03 | 1.16 | 0.18 |
| 1.37E-12 | hsa-miR-149*   | 1.68 | 0.11 | 1.01 | 0.08 | 2.25 | 0.10 | 1.18 | 0.09 | 0.78 | 0.10 | 1.58 | 0.08 | 1.94 | 0.11 | 0.99 | 0.10 | 2.89 | 0.11 | 1.21 | 0.08 | 1.38 | 0.08 |
| 3.85E-07 | hsa-miR-150    | 2.22 | 0.34 | 0.69 | 0.21 | 1.62 | 0.20 | 0.61 | 0.10 | 0.50 | 0.21 | 0.72 | 0.02 | 0.84 | 0.10 | 0.52 | 0.26 | 1.16 | 0.03 | 1.01 | 0.29 | 1.62 | 0.09 |
| 7.67E-07 | hsa-miR-151-3p | 2.38 | 0.10 | 1.34 | 0.13 | 2.48 | 0.06 | 1.00 | 0.28 | 0.29 | 0.22 | 1.70 | 0.29 | 1.71 | 0.09 | 1.08 | 0.10 | 2.34 | 0.08 | 2.65 | 0.09 | 2.40 | 0.08 |
| 1.62E-06 | hsa-miR-151-5p | 1.47 | 0.29 | 0.84 | 0.32 | 1.33 | 0.14 | 0.75 | 0.15 | 0.12 | 0.49 | 1.38 | 0.12 | 0.66 | 0.17 | 0.28 | 0.28 | 1.04 | 0.14 | 1.56 | 0.13 | 1.78 | 0.13 |
| 3.05E-15 | hsa-miR-15a    | 1.07 | 0.01 | 0.57 | 0.04 | 1.18 | 0.01 | 0.63 | 0.07 | 0.24 | 0.00 | 1.03 | 0.09 | 0.66 | 0.03 | 0.36 | 0.01 | 0.96 | 0.04 | 1.21 | 0.05 | 1.29 | 0.03 |
| 9.47E-07 | hsa-miR-15b    | 0.94 | 0.01 | 0.53 | 0.05 | 0.93 | 0.07 | 0.59 | 0.04 | 0.48 | 0.09 | 0.70 | 0.00 | 0.70 | 0.08 | 0.59 | 0.06 | 0.81 | 0.09 | 0.65 | 0.06 | 0.66 | 0.11 |
| 3.4E-14  | hsa-miR-16     | 1.02 | 0.02 | 0.62 | 0.08 | 1.03 | 0.03 | 0.67 | 0.02 | 0.30 | 0.03 | 1.03 | 0.03 | 0.74 | 0.02 | 0.46 | 0.03 | 1.02 | 0.04 | 1.03 | 0.03 | 1.01 | 0.04 |
| 1.07E-07 | hsa-miR-16-2*  | 1.42 | 0.09 | 0.70 | 0.12 | 1.82 | 0.03 | 0.84 | 0.19 | 0.09 | 0.12 | 1.60 | 0.20 | 1.01 | 0.08 | 0.38 | 0.49 | 1.61 | 0.01 | 1.38 | 0.09 | 1.82 | 0.06 |
| 1.19E-22 | hsa-miR-17     | 1.26 | 0.01 | 0.79 | 0.00 | 1.26 | 0.00 | 0.72 | 0.05 | 0.19 | 0.01 | 1.26 | 0.06 | 0.67 | 0.03 | 0.41 | 0.00 | 0.94 | 0.05 | 1.48 | 0.01 | 1.47 | 0.01 |
| 1.28E-05 | hsa-miR-17*    | 2.02 | 0.01 | 0.84 | 0.03 | 1.80 | 0.03 | 0.73 | 0.12 | 0.29 | 0.01 | 1.15 | 0.15 | 1.41 | 0.08 | 0.94 | 0.01 | 1.88 | 0.13 | 1.63 | 0.00 | 1.70 | 0.11 |
| 1.46E-08 | hsa-miR-181a   | 1.64 | 0.04 | 1.56 | 0.06 | 1.74 | 0.06 | 1.14 | 0.04 | 1.06 | 0.02 | 1.22 | 0.05 | 1.89 | 0.03 | 1.64 | 0.02 | 2.15 | 0.04 | 1.76 | 0.03 | 2.26 | 0.06 |
| 4.69E-08 | hsa-miR-182    | 1.35 | 0.10 | 0.59 | 0.12 | 1.13 | 0.13 | 0.48 | 0.10 | 0.09 | 0.05 | 0.86 | 0.11 | 0.68 | 0.18 | 0.46 | 0.09 | 0.89 | 0.22 | 1.37 | 0.12 | 1.39 | 0.19 |
| 2.15E-09 | hsa-miR-1826   | 1.01 | 0.04 | 0.61 | 0.09 | 0.97 | 0.03 | 0.91 | 0.03 | 0.89 | 0.02 | 0.94 | 0.04 | 0.74 | 0.03 | 0.59 | 0.02 | 0.89 | 0.06 | 0.71 | 0.04 | 0.88 | 0.01 |
| 0.000408 | hsa-miR-1827   | 1.24 | 0.09 | 0.72 | 0.13 | 1.15 | 0.03 | 0.85 | 0.17 | 0.76 | 0.11 | 0.94 | 0.22 | 1.03 | 0.15 | 0.91 | 0.11 | 1.15 | 0.19 | 0.82 | 0.13 | 1.23 | 0.13 |
| 3.24E-15 | hsa-miR-183    | 1.32 | 0.01 | 0.78 | 0.01 | 1.14 | 0.01 | 0.54 | 0.04 | 0.23 | 0.10 | 0.84 | 0.07 | 0.99 | 0.03 | 0.83 | 0.06 | 1.15 | 0.10 | 1.22 | 0.01 | 1.10 | 0.01 |
| 2.14E-09 | hsa-miR-183*   | 1.88 | 0.02 | 0.96 | 0.04 | 2.27 | 0.01 | 1.02 | 0.04 | 0.84 | 0.01 | 1.20 | 0.07 | 1.83 | 0.04 | 0.76 | 0.03 | 2.89 | 0.06 | 1.59 | 0.00 | 1.34 | 0.14 |
| 7.41E-14 | hsa-miR-184    | 1.93 | 0.04 | 1.75 | 0.08 | 2.82 | 0.05 | 1.33 | 0.09 | 0.99 | 0.09 | 1.67 | 0.09 | 2.29 | 0.10 | 1.45 | 0.13 | 3.14 | 0.09 | 2.43 | 0.08 | 2.16 | 0.04 |
| 6.3E-08  | hsa-miR-185    | 1.78 | 0.03 | 0.91 | 0.06 | 1.90 | 0.03 | 0.93 | 0.04 | 0.25 | 0.03 | 1.62 | 0.06 | 1.10 | 0.15 | 0.92 | 0.05 | 1.28 | 0.23 | 1.54 | 0.02 | 1.39 | 0.06 |
| 6.02E-19 | hsa-miR-185*   | 2.15 | 0.05 | 1.15 | 0.04 | 2.93 | 0.02 | 1.03 | 0.07 | 0.82 | 0.04 | 1.25 | 0.09 | 2.32 | 0.01 | 0.95 | 0.03 | 3.70 | 0.00 | 1.42 | 0.01 | 1.75 | 0.01 |
| 3.18E-09 | hsa-miR-186    | 0.84 | 0.03 | 0.48 | 0.03 | 0.81 | 0.01 | 0.44 | 0.03 | 0.21 | 0.06 | 0.68 | 0.02 | 0.67 | 0.07 | 0.52 | 0.00 | 0.81 | 0.11 | 0.83 | 0.04 | 0.74 | 0.12 |
| 5.67E-12 | hsa-miR-18a    | 1.96 | 0.07 | 1.22 | 0.11 | 2.13 | 0.12 | 1.09 | 0.27 | 0.24 | 0.09 | 1.93 | 0.29 | 1.00 | 0.16 | 0.68 | 0.11 | 1.32 | 0.18 | 2.74 | 0.12 | 2.36 | 0.16 |
| 9.16E-16 | hsa-miR-18b    | 1.46 | 0.04 | 1.06 | 0.04 | 1.59 | 0.00 | 0.87 | 0.11 | 0.21 | 0.03 | 1.53 | 0.12 | 0.81 | 0.08 | 0.51 | 0.00 | 1.11 | 0.12 | 1.90 | 0.05 | 1.86 | 0.04 |
| 1.92E-07 | hsa-miR-191    | 1.47 | 0.13 | 0.92 | 0.14 | 1.47 | 0.11 | 0.70 | 0.01 | 0.32 | 0.14 | 1.09 | 0.03 | 1.06 | 0.17 | 0.87 | 0.15 | 1.25 | 0.19 | 1.34 | 0.12 | 1.33 | 0.16 |
| 4.7E-13  | hsa-miR-194    | 1.79 | 0.00 | 0.84 | 0.08 | 1.93 | 0.02 | 0.87 | 0.17 | 0.20 | 0.05 | 1.53 | 0.20 | 1.05 | 0.02 | 0.76 | 0.04 | 1.34 | 0.06 | 1.64 | 0.01 | 1.39 | 0.02 |
| 6.9E-12  | hsa-miR-195    | 1.06 | 0.06 | 0.27 | 0.16 | 1.01 | 0.04 | 0.45 | 0.11 | 0.08 | 0.17 | 0.82 | 0.10 | 0.45 | 0.02 | 0.16 | 0.17 | 0.73 | 0.06 | 1.32 | 0.06 | 1.24 | 0.17 |
| 4.61E-19 | hsa-miR-19a    | 1.41 | 0.03 | 0.81 | 0.06 | 1.33 | 0.03 | 0.82 | 0.01 | 0.30 | 0.00 | 1.35 | 0.02 | 0.87 | 0.03 | 0.51 | 0.03 | 1.22 | 0.03 | 1.23 | 0.01 | 1.49 | 0.07 |
| 1.21E-12 | hsa-miR-19b    | 1.65 | 0.10 | 1.10 | 0.06 | 1.47 | 0.04 | 0.88 | 0.14 | 0.52 | 0.06 | 1.24 | 0.17 | 1.18 | 0.11 | 0.86 | 0.08 | 1.49 | 0.12 | 1.62 | 0.02 | 1.74 | 0.19 |
| 2.42E-13 | hsa-miR-20a    | 0.95 | 0.10 | 0.50 | 0.22 | 0.85 | 0.20 | 0.45 | 0.18 | 0.18 | 0.09 | 0.73 | 0.20 | 0.40 | 0.12 | 0.21 | 0.24 | 0.59 | 0.08 | 0.74 | 0.15 | 1.04 | 0.04 |
| 9.52E-12 | hsa-miR-20b    | 1.29 | 0.09 | 0.71 | 0.06 | 1.29 | 0.06 | 0.69 | 0.14 | 0.12 | 0.04 | 1.25 | 0.15 | 0.65 | 0.09 | 0.36 | 0.04 | 0.93 | 0.11 | 1.37 | 0.03 | 1.46 | 0.14 |
| 3.83E-10 | hsa-miR-21     | 1.34 | 0.14 | 0.58 | 0.15 | 1.28 | 0.15 | 0.75 | 0.00 | 0.17 | 0.17 | 1.33 | 0.02 | 0.75 | 0.12 | 0.35 | 0.12 | 1.15 | 0.12 | 1.72 | 0.15 | 1.79 | 0.20 |
| 4.83E-09 | hsa-miR-22     | 1.26 | 0.01 | 0.85 | 0.05 | 1.28 | 0.02 | 0.59 | 0.05 | 0.30 | 0.02 | 0.87 | 0.06 | 1.17 | 0.02 | 1.03 | 0.01 | 1.30 | 0.04 | 0.99 | 0.07 | 1.00 | 0.12 |
| 8.16E-11 | hsa-miR-222    | 1.31 | 0.10 | 0.85 | 0.08 | 1.26 | 0.10 | 0.67 | 0.06 | 0.17 | 0.04 | 1.18 | 0.06 | 0.83 | 0.09 | 0.56 | 0.07 | 1.11 | 0.10 | 1.70 | 0.10 | 1.57 | 0.11 |
| 2.51E-12 | hsa-miR-223    | 1.44 | 0.04 | 0.88 | 0.08 | 1.42 | 0.02 | 0.93 | 0.06 | 0.25 | 0.01 | 1.61 | 0.08 | 0.57 | 0.03 | 0.35 | 0.06 | 0.80 | 0.02 | 1.71 | 0.04 | 1.72 | 0.11 |
| 6.33E-12 | hsa-miR-23a    | 1.63 | 0.00 | 1.21 | 0.01 | 1.37 | 0.03 | 0.86 | 0.02 | 0.37 | 0.03 | 1.36 | 0.02 | 0.80 | 0.12 | 0.61 | 0.30 | 0.97 | 0.01 | 1.78 | 0.11 | 1.94 | 0.06 |
| 3.04E-16 | hsa-miR-23b    | 1.37 | 0.05 | 0.97 | 0.03 | 1.18 | 0.04 | 0.67 | 0.09 | 0.21 | 0.42 | 1.10 | 0.20 | 0.78 | 0.10 | 0.64 | 0.06 | 0.91 | 0.13 | 1.39 | 0.06 | 1.75 | 0.10 |
| 1.6E-11  | hsa-miR-24     | 1.23 | 0.10 | 0.87 | 0.11 | 1.06 | 0.04 | 0.58 | 0.16 | 0.25 | 0.04 | 0.91 | 0.20 | 0.71 | 0.01 | 0.60 | 0.04 | 0.82 | 0.01 | 1.17 | 0.05 | 1.50 | 0.01 |
| 1.35E-08 | hsa-miR-24-1*  | 1.19 | 0.03 | 0.97 | 0.04 | 1.30 | 0.02 | 0.81 | 0.00 | 0.39 | 0.00 | 1.24 | 0.00 | 1.27 | 0.02 | 0.83 | 0.01 | 1.72 | 0.03 | 1.24 | 0.10 | 1.27 | 0.03 |
| 2.56E-15 | hsa-miR-25     | 1.24 | 0.06 | 0.80 | 0.02 | 1.21 | 0.04 | 0.56 | 0.10 | 0.27 | 0.02 | 0.85 | 0.14 | 0.80 | 0.05 | 0.52 | 0.03 | 1.08 | 0.05 | 1.23 | 0.07 | 1.44 | 0.04 |
| 2.54E-08 | hsa-miR-25*    | 1.64 | 0.07 | 1.21 | 0.04 | 1.91 | 0.03 | 1.48 | 0.09 | 1.27 | 0.07 | 1.66 | 0.21 | 2.18 | 0.20 | 1.26 | 0.04 | 3.07 | 0.26 | 1.62 | 0.05 | 1.45 | 0.17 |
| 2.96E-15 | hsa-miR-26a    | 1.17 | 0.00 | 0.70 | 0.05 | 1.10 | 0.02 | 0.58 | 0.08 | 0.18 | 0.04 | 0.98 | 0.10 | 0.67 | 0.00 | 0.43 | 0.01 | 0.91 | 0.00 | 1.28 | 0.07 | 1.29 | 0.00 |

|          |                 |      |      |      |      |      |      |      |      |      |      |      |      |      |      |      |      |      |      |      |      |      |      |
|----------|-----------------|------|------|------|------|------|------|------|------|------|------|------|------|------|------|------|------|------|------|------|------|------|------|
| 9.65E-11 | hsa-miR-26b     | 0.97 | 0.21 | 0.47 | 0.20 | 0.92 | 0.20 | 0.57 | 0.00 | 0.19 | 0.23 | 0.94 | 0.05 | 0.48 | 0.18 | 0.28 | 0.20 | 0.68 | 0.17 | 1.00 | 0.20 | 1.19 | 0.11 |
| 5.41E-17 | hsa-miR-299-3p  | 2.15 | 0.03 | 1.45 | 0.03 | 1.79 | 0.01 | 1.16 | 0.00 | 1.41 | 0.01 | 0.90 | 0.02 | 1.84 | 0.00 | 1.39 | 0.01 | 2.29 | 0.00 | 1.71 | 0.03 | 1.27 | 0.08 |
| 4.16E-14 | hsa-miR-29a     | 1.40 | 0.03 | 0.85 | 0.02 | 1.48 | 0.04 | 0.75 | 0.02 | 0.28 | 0.09 | 1.22 | 0.05 | 0.96 | 0.02 | 0.64 | 0.03 | 1.29 | 0.01 | 1.34 | 0.06 | 1.42 | 0.02 |
| 1.69E-09 | hsa-miR-29b     | 1.58 | 0.04 | 1.10 | 0.12 | 1.45 | 0.07 | 0.84 | 0.02 | 0.44 | 0.06 | 1.23 | 0.01 | 0.99 | 0.07 | 0.41 | 0.04 | 1.56 | 0.10 | 2.03 | 0.02 | 1.77 | 0.17 |
| 5.67E-10 | hsa-miR-29c     | 2.34 | 0.01 | 1.21 | 0.12 | 2.38 | 0.01 | 1.08 | 0.09 | 0.30 | 0.00 | 1.85 | 0.10 | 1.58 | 0.03 | 1.01 | 0.25 | 2.13 | 0.08 | 3.14 | 0.04 | 2.25 | 0.02 |
| 3.64E-08 | hsa-miR-300     | 1.28 | 0.01 | 0.84 | 0.01 | 1.11 | 0.01 | 0.56 | 0.02 | 0.56 | 0.02 | 0.56 | 0.05 | 1.10 | 0.01 | 0.78 | 0.01 | 1.42 | 0.00 | 1.31 | 0.02 | 1.29 | 0.04 |
| 4.62E-09 | hsa-miR-301a    | 1.56 | 0.05 | 0.88 | 0.12 | 1.63 | 0.05 | 0.97 | 0.10 | 0.20 | 0.14 | 1.74 | 0.13 | 0.81 | 0.07 | 0.47 | 0.13 | 1.15 | 0.04 | 2.05 | 0.10 | 2.07 | 0.03 |
| 9.64E-09 | hsa-miR-30a     | 1.30 | 0.05 | 0.86 | 0.07 | 1.41 | 0.04 | 0.72 | 0.09 | 0.34 | 0.04 | 1.11 | 0.10 | 1.05 | 0.02 | 0.72 | 0.06 | 1.38 | 0.00 | 1.33 | 0.04 | 1.34 | 0.02 |
| 4.9E-10  | hsa-miR-30b     | 0.98 | 0.03 | 0.57 | 0.02 | 1.00 | 0.04 | 0.59 | 0.01 | 0.16 | 0.02 | 1.01 | 0.01 | 0.53 | 0.06 | 0.28 | 0.02 | 0.78 | 0.07 | 1.07 | 0.00 | 1.24 | 0.07 |
| 1.77E-14 | hsa-miR-30c     | 1.29 | 0.10 | 0.73 | 0.11 | 1.17 | 0.06 | 0.66 | 0.04 | 0.17 | 0.10 | 1.16 | 0.03 | 0.64 | 0.09 | 0.39 | 0.06 | 0.89 | 0.10 | 1.30 | 0.08 | 1.53 | 0.03 |
| 3.68E-09 | hsa-miR-30d     | 1.48 | 0.05 | 0.99 | 0.03 | 1.66 | 0.07 | 0.77 | 0.03 | 0.39 | 0.07 | 1.16 | 0.06 | 1.36 | 0.08 | 1.03 | 0.05 | 1.68 | 0.10 | 1.29 | 0.07 | 1.22 | 0.09 |
| 3.59E-11 | hsa-miR-30e     | 1.16 | 0.00 | 0.74 | 0.05 | 1.18 | 0.02 | 0.71 | 0.05 | 0.22 | 0.01 | 1.20 | 0.06 | 0.73 | 0.06 | 0.40 | 0.02 | 1.05 | 0.09 | 1.21 | 0.01 | 1.47 | 0.04 |
| 1.29E-08 | hsa-miR-32*     | 1.04 | 0.01 | 0.48 | 0.01 | 1.15 | 0.04 | 0.66 | 0.04 | 0.54 | 0.03 | 0.78 | 0.08 | 0.75 | 0.02 | 0.56 | 0.00 | 0.95 | 0.04 | 0.77 | 0.00 | 0.76 | 0.03 |
| 2.62E-12 | hsa-miR-320a    | 2.07 | 0.11 | 1.19 | 0.10 | 2.60 | 0.10 | 1.10 | 0.01 | 0.70 | 0.11 | 1.50 | 0.03 | 2.18 | 0.05 | 1.57 | 0.09 | 2.80 | 0.03 | 1.75 | 0.12 | 1.35 | 0.11 |
| 1.25E-08 | hsa-miR-320b    | 1.52 | 0.03 | 0.88 | 0.01 | 1.81 | 0.00 | 0.86 | 0.07 | 0.57 | 0.02 | 1.15 | 0.09 | 1.53 | 0.05 | 1.19 | 0.05 | 1.87 | 0.04 | 1.26 | 0.04 | 1.03 | 0.05 |
| 3.06E-10 | hsa-miR-320c    | 1.39 | 0.09 | 0.73 | 0.00 | 1.77 | 0.00 | 0.78 | 0.08 | 0.47 | 0.02 | 1.09 | 0.11 | 1.40 | 0.01 | 1.00 | 0.02 | 1.79 | 0.01 | 1.04 | 0.02 | 0.84 | 0.08 |
| 3.4E-09  | hsa-miR-320d    | 1.56 | 0.07 | 0.88 | 0.14 | 1.96 | 0.11 | 0.87 | 0.01 | 0.60 | 0.07 | 1.13 | 0.05 | 1.55 | 0.08 | 1.14 | 0.12 | 1.97 | 0.06 | 1.28 | 0.09 | 1.04 | 0.00 |
| 1.27E-08 | hsa-miR-324-5p  | 1.26 | 0.18 | 0.43 | 0.25 | 1.14 | 0.20 | 0.44 | 0.35 | 0.15 | 0.35 | 0.73 | 0.35 | 0.65 | 0.13 | 0.46 | 0.20 | 0.83 | 0.09 | 0.84 | 0.13 | 0.70 | 0.23 |
| 2.18E-07 | hsa-miR-326     | 1.31 | 0.13 | 0.96 | 0.10 | 1.24 | 0.14 | 1.00 | 0.19 | 0.68 | 0.22 | 1.31 | 0.17 | 0.74 | 0.13 | 0.49 | 0.16 | 0.99 | 0.11 | 1.63 | 0.16 | 1.33 | 0.04 |
| 1.39E-06 | hsa-miR-331-3p  | 1.44 | 0.05 | 0.72 | 0.07 | 1.71 | 0.01 | 0.89 | 0.20 | 0.41 | 0.03 | 1.37 | 0.25 | 1.27 | 0.10 | 0.94 | 0.05 | 1.60 | 0.13 | 1.15 | 0.03 | 0.95 | 0.12 |
| 1.6E-07  | hsa-miR-339-5p  | 2.26 | 0.28 | 1.40 | 0.28 | 1.86 | 0.29 | 0.98 | 0.47 | 0.48 | 0.27 | 1.48 | 0.53 | 1.74 | 0.28 | 1.78 | 0.27 | 1.71 | 0.29 | 2.08 | 0.26 | 1.75 | 0.28 |
| 5.81E-08 | hsa-miR-342-3p  | 1.29 | 0.01 | 0.66 | 0.22 | 1.13 | 0.08 | 0.65 | 0.04 | 0.15 | 0.16 | 1.15 | 0.06 | 0.56 | 0.02 | 0.36 | 0.08 | 0.75 | 0.01 | 0.83 | 0.04 | 1.39 | 0.02 |
| 6.56E-11 | hsa-miR-34b     | 1.20 | 0.06 | 0.88 | 0.10 | 1.38 | 0.05 | 1.03 | 0.08 | 0.99 | 0.00 | 1.06 | 0.16 | 1.14 | 0.01 | 0.53 | 0.07 | 1.75 | 0.01 | 1.08 | 0.02 | 1.15 | 0.03 |
| 8.91E-10 | hsa-miR-361-5p  | 1.58 | 0.03 | 1.06 | 0.05 | 1.79 | 0.05 | 0.88 | 0.14 | 0.23 | 0.05 | 1.52 | 0.17 | 1.23 | 0.02 | 0.88 | 0.23 | 1.54 | 0.17 | 1.80 | 0.01 | 2.05 | 0.16 |
| 7.01E-08 | hsa-miR-362-5p  | 1.78 | 0.00 | 0.78 | 0.10 | 1.85 | 0.02 | 0.75 | 0.16 | 0.18 | 0.08 | 1.31 | 0.19 | 1.12 | 0.11 | 0.55 | 0.14 | 1.67 | 0.19 | 1.73 | 0.02 | 1.54 | 0.03 |
| 8.88E-09 | hsa-miR-363     | 1.24 | 0.18 | 0.57 | 0.20 | 1.42 | 0.18 | 0.67 | 0.02 | 0.24 | 0.20 | 1.09 | 0.07 | 0.95 | 0.15 | 0.57 | 0.21 | 1.33 | 0.12 | 1.10 | 0.22 | 1.10 | 0.11 |
| 1.39E-14 | hsa-miR-374a    | 0.93 | 0.01 | 0.50 | 0.06 | 0.96 | 0.02 | 0.66 | 0.11 | 0.16 | 0.04 | 1.16 | 0.13 | 0.47 | 0.02 | 0.25 | 0.07 | 0.68 | 0.05 | 1.00 | 0.03 | 1.11 | 0.04 |
| 5.26E-12 | hsa-miR-378     | 1.43 | 0.03 | 0.82 | 0.01 | 1.30 | 0.04 | 0.63 | 0.01 | 0.25 | 0.08 | 1.01 | 0.00 | 1.14 | 0.02 | 0.96 | 0.01 | 1.31 | 0.05 | 1.22 | 0.03 | 1.23 | 0.08 |
| 1.82E-09 | hsa-miR-423-3p  | 1.35 | 0.01 | 0.77 | 0.03 | 1.44 | 0.04 | 0.76 | 0.05 | 0.44 | 0.02 | 1.07 | 0.06 | 1.21 | 0.01 | 1.11 | 0.01 | 1.32 | 0.02 | 0.96 | 0.00 | 0.90 | 0.00 |
| 2.61E-07 | hsa-miR-423-5p  | 1.81 | 0.11 | 0.86 | 0.11 | 2.22 | 0.12 | 0.91 | 0.01 | 0.68 | 0.08 | 1.14 | 0.03 | 1.57 | 0.11 | 1.18 | 0.11 | 1.96 | 0.11 | 1.11 | 0.11 | 0.92 | 0.14 |
| 1.51E-08 | hsa-miR-425     | 1.29 | 0.04 | 0.91 | 0.02 | 1.41 | 0.03 | 0.82 | 0.05 | 0.44 | 0.03 | 1.19 | 0.06 | 1.15 | 0.04 | 0.80 | 0.02 | 1.50 | 0.05 | 1.19 | 0.01 | 1.45 | 0.03 |
| 0.04609  | hsa-miR-451     | 1.00 | 0.00 | 1.00 | 0.00 | 1.00 | 0.00 | 1.00 | 0.00 | 1.00 | 0.00 | 1.00 | 0.00 | 1.00 | 0.00 | 1.00 | 0.00 | 1.00 | 0.00 | 1.00 | 0.00 | 1.00 | 0.00 |
| 1.24E-08 | hsa-miR-484     | 1.49 | 0.02 | 0.86 | 0.05 | 1.61 | 0.09 | 0.82 | 0.06 | 0.53 | 0.06 | 1.11 | 0.06 | 1.32 | 0.12 | 1.03 | 0.07 | 1.61 | 0.14 | 0.99 | 0.07 | 0.90 | 0.10 |
| 0.00014  | hsa-miR-485-3p  | 1.53 | 0.06 | 0.78 | 0.04 | 1.74 | 0.06 | 0.98 | 0.04 | 0.34 | 0.05 | 1.62 | 0.03 | 1.43 | 0.07 | 0.78 | 0.03 | 2.08 | 0.10 | 1.00 | 0.15 | 1.65 | 0.03 |
| 0.001086 | hsa-miR-486-5p  | 1.21 | 0.02 | 1.19 | 0.00 | 1.21 | 0.02 | 1.06 | 0.00 | 0.90 | 0.02 | 1.21 | 0.02 | 1.21 | 0.02 | 1.21 | 0.02 | 1.21 | 0.02 | 1.08 | 0.02 | 1.19 | 0.03 |
| 9.54E-08 | hsa-miR-487b    | 1.27 | 0.07 | 0.79 | 0.03 | 1.32 | 0.05 | 0.76 | 0.18 | 0.17 | 0.16 | 1.34 | 0.22 | 0.99 | 0.04 | 0.64 | 0.02 | 1.34 | 0.05 | 1.62 | 0.04 | 0.90 | 0.02 |
| 3.36E-05 | hsa-miR-491-3p  | 1.57 | 0.12 | 1.25 | 0.10 | 1.58 | 0.11 | 1.01 | 0.04 | 0.80 | 0.12 | 1.23 | 0.01 | 1.47 | 0.11 | 1.40 | 0.11 | 1.54 | 0.11 | 1.37 | 0.11 | 1.16 | 0.17 |
| 1.36E-11 | hsa-miR-494     | 2.07 | 0.01 | 1.53 | 0.01 | 2.03 | 0.01 | 1.47 | 0.04 | 1.42 | 0.02 | 1.51 | 0.11 | 1.92 | 0.05 | 1.60 | 0.03 | 2.24 | 0.06 | 1.76 | 0.03 | 1.97 | 0.03 |
| 3.35E-08 | hsa-miR-500     | 2.07 | 0.10 | 1.50 | 0.11 | 2.72 | 0.11 | 1.41 | 0.10 | 0.31 | 0.10 | 2.51 | 0.12 | 1.81 | 0.11 | 1.24 | 0.12 | 2.39 | 0.10 | 2.81 | 0.13 | 3.41 | 0.22 |
| 7.05E-08 | hsa-miR-501-5p  | 1.52 | 0.05 | 0.65 | 0.08 | 1.69 | 0.04 | 0.74 | 0.05 | 0.30 | 0.11 | 1.17 | 0.04 | 1.27 | 0.10 | 0.76 | 0.03 | 1.77 | 0.13 | 1.20 | 0.06 | 0.70 | 0.33 |
| 1.19E-11 | hsa-miR-513a-5p | 2.04 | 0.00 | 1.30 | 0.03 | 2.01 | 0.02 | 1.29 | 0.05 | 1.30 | 0.00 | 1.28 | 0.09 | 1.89 | 0.01 | 1.62 | 0.00 | 2.16 | 0.01 | 1.58 | 0.00 | 1.76 | 0.01 |
| 1.19E-18 | hsa-miR-519d    | 1.78 | 0.01 | 1.29 | 0.05 | 2.10 | 0.00 | 1.22 | 0.01 | 0.36 | 0.08 | 2.09 | 0.03 | 1.29 | 0.02 | 1.03 | 0.01 | 1.56 | 0.03 | 2.21 | 0.04 | 1.98 | 0.04 |

|          |                |      |      |      |      |      |      |      |      |      |      |      |      |      |      |      |      |      |      |      |      |      |      |
|----------|----------------|------|------|------|------|------|------|------|------|------|------|------|------|------|------|------|------|------|------|------|------|------|------|
| 9.13E-06 | hsa-miR-519e   | 0.63 | 0.05 | 0.59 | 0.00 | 0.90 | 0.02 | 0.78 | 0.16 | 0.58 | 0.06 | 0.97 | 0.21 | 0.43 | 0.03 | 0.30 | 0.07 | 0.57 | 0.00 | 0.93 | 0.06 | 0.76 | 0.08 |
| 4.23E-05 | hsa-miR-519e*  | 2.76 | 0.05 | 2.04 | 0.06 | 3.53 | 0.08 | 2.18 | 0.12 | 1.25 | 0.06 | 3.11 | 0.14 | 2.77 | 0.12 | 1.75 | 0.08 | 3.79 | 0.14 | 3.23 | 0.07 | 2.86 | 0.17 |
| 0.000314 | hsa-miR-532-5p | 1.65 | 0.12 | 0.83 | 0.10 | 1.74 | 0.11 | 0.66 | 0.13 | 0.29 | 0.12 | 1.02 | 0.14 | 1.07 | 0.29 | 0.54 | 0.23 | 1.59 | 0.31 | 2.10 | 0.12 | 2.07 | 0.24 |
| 5.2E-13  | hsa-miR-549    | 1.65 | 0.06 | 1.26 | 0.03 | 1.72 | 0.04 | 1.21 | 0.11 | 1.23 | 0.05 | 1.19 | 0.16 | 1.62 | 0.05 | 0.99 | 0.03 | 2.25 | 0.06 | 1.74 | 0.02 | 1.52 | 0.08 |
| 2.43E-08 | hsa-miR-550    | 1.81 | 0.09 | 1.06 | 0.10 | 1.91 | 0.09 | 1.32 | 0.04 | 1.29 | 0.12 | 1.33 | 0.04 | 1.52 | 0.12 | 1.09 | 0.12 | 1.95 | 0.13 | 1.49 | 0.10 | 1.36 | 0.15 |
| 3.13E-05 | hsa-miR-550*   | 1.37 | 0.15 | 0.94 | 0.13 | 1.50 | 0.07 | 0.85 | 0.06 | 0.41 | 0.04 | 1.29 | 0.09 | 1.26 | 0.05 | 1.04 | 0.12 | 1.47 | 0.00 | 1.27 | 0.11 | 1.25 | 0.09 |
| 4.77E-07 | hsa-miR-551b   | 1.12 | 0.07 | 0.85 | 0.01 | 1.13 | 0.04 | 0.89 | 0.01 | 0.89 | 0.05 | 0.89 | 0.02 | 0.84 | 0.01 | 0.66 | 0.02 | 1.02 | 0.00 | 1.05 | 0.03 | 1.25 | 0.13 |
| 2.04E-07 | hsa-miR-574-5p | 1.05 | 0.11 | 0.38 | 0.17 | 1.32 | 0.22 | 0.56 | 0.15 | 0.50 | 0.12 | 0.62 | 0.18 | 0.74 | 0.06 | 0.43 | 0.22 | 1.04 | 0.00 | 0.74 | 0.15 | 0.63 | 0.18 |
| 7.16E-10 | hsa-miR-584    | 1.87 | 0.11 | 1.20 | 0.09 | 2.03 | 0.11 | 1.16 | 0.10 | 0.70 | 0.10 | 1.62 | 0.10 | 1.48 | 0.10 | 0.95 | 0.09 | 2.02 | 0.11 | 2.39 | 0.10 | 1.80 | 0.14 |
| 1.82E-09 | hsa-miR-602    | 2.48 | 0.03 | 1.83 | 0.08 | 3.06 | 0.03 | 1.47 | 0.01 | 1.37 | 0.08 | 1.56 | 0.10 | 2.57 | 0.06 | 1.94 | 0.02 | 3.19 | 0.08 | 2.45 | 0.10 | 2.46 | 0.04 |
| 2.65E-14 | hsa-miR-628-3p | 1.67 | 0.11 | 0.94 | 0.13 | 2.30 | 0.07 | 0.96 | 0.10 | 0.87 | 0.05 | 1.04 | 0.15 | 2.09 | 0.03 | 0.77 | 0.07 | 3.41 | 0.02 | 1.33 | 0.08 | 1.23 | 0.05 |
| 1.35E-10 | hsa-miR-634    | 1.70 | 0.07 | 1.49 | 0.10 | 2.31 | 0.05 | 0.94 | 0.18 | 0.57 | 0.11 | 1.31 | 0.21 | 1.41 | 0.00 | 1.00 | 0.05 | 1.81 | 0.03 | 2.72 | 0.03 | 1.87 | 0.15 |
| 1.89E-14 | hsa-miR-637    | 2.25 | 0.01 | 1.30 | 0.04 | 2.96 | 0.04 | 1.13 | 0.04 | 1.10 | 0.00 | 1.16 | 0.08 | 2.43 | 0.06 | 0.95 | 0.01 | 3.92 | 0.08 | 2.00 | 0.02 | 1.87 | 0.10 |
| 7.75E-08 | hsa-miR-638    | 1.52 | 0.15 | 1.16 | 0.14 | 2.36 | 0.19 | 1.10 | 0.25 | 1.09 | 0.15 | 1.10 | 0.34 | 2.23 | 0.20 | 0.92 | 0.10 | 3.54 | 0.23 | 1.30 | 0.15 | 1.62 | 0.33 |
| 1.79E-05 | hsa-miR-642    | 0.83 | 0.17 | 0.57 | 0.14 | 0.83 | 0.15 | 0.60 | 0.09 | 0.48 | 0.18 | 0.71 | 0.02 | 0.83 | 0.22 | 0.75 | 0.29 | 0.91 | 0.16 | 0.70 | 0.13 | 0.86 | 0.09 |
| 4.74E-08 | hsa-miR-652    | 1.14 | 0.07 | 0.66 | 0.06 | 1.30 | 0.07 | 0.71 | 0.16 | 0.43 | 0.07 | 0.99 | 0.20 | 1.03 | 0.06 | 0.72 | 0.08 | 1.33 | 0.05 | 1.01 | 0.06 | 0.88 | 0.07 |
| 3.56E-09 | hsa-miR-665    | 3.02 | 0.10 | 1.81 | 0.10 | 3.26 | 0.10 | 2.33 | 0.03 | 2.26 | 0.07 | 2.39 | 0.11 | 2.67 | 0.02 | 2.39 | 0.04 | 2.96 | 0.01 | 2.05 | 0.06 | 1.57 | 0.05 |
| 9.95E-05 | hsa-miR-668    | 1.96 | 0.06 | 0.97 | 0.04 | 2.09 | 0.00 | 1.25 | 0.09 | 1.05 | 0.03 | 1.44 | 0.12 | 1.33 | 0.01 | 0.70 | 0.04 | 1.97 | 0.03 | 1.91 | 0.03 | 1.70 | 0.29 |
| 1.28E-10 | hsa-miR-7      | 0.81 | 0.08 | 0.34 | 0.04 | 0.86 | 0.05 | 0.48 | 0.13 | 0.25 | 0.24 | 0.72 | 0.09 | 0.47 | 0.04 | 0.23 | 0.05 | 0.71 | 0.04 | 0.93 | 0.02 | 1.58 | 0.07 |
| 1.86E-05 | hsa-miR-720    | 1.63 | 0.15 | 0.91 | 0.11 | 1.51 | 0.12 | 0.96 | 0.02 | 0.65 | 0.15 | 1.27 | 0.04 | 1.15 | 0.18 | 0.93 | 0.15 | 1.36 | 0.20 | 1.27 | 0.16 | 1.11 | 0.25 |
| 6.95E-08 | hsa-miR-744    | 1.84 | 0.07 | 1.09 | 0.06 | 2.03 | 0.01 | 0.98 | 0.02 | 0.80 | 0.00 | 1.16 | 0.04 | 1.74 | 0.04 | 1.22 | 0.01 | 2.26 | 0.06 | 1.29 | 0.03 | 1.38 | 0.07 |
| 9.74E-10 | hsa-miR-765    | 1.33 | 0.02 | 0.98 | 0.00 | 1.31 | 0.01 | 0.91 | 0.05 | 0.86 | 0.00 | 0.96 | 0.10 | 1.17 | 0.01 | 1.04 | 0.01 | 1.29 | 0.01 | 1.17 | 0.00 | 1.11 | 0.04 |
| 1.39E-09 | hsa-miR-768-3p | 1.49 | 0.01 | 0.94 | 0.01 | 1.49 | 0.01 | 1.13 | 0.06 | 1.09 | 0.01 | 1.16 | 0.12 | 1.15 | 0.09 | 0.71 | 0.03 | 1.59 | 0.14 | 0.92 | 0.06 | 1.29 | 0.06 |
| 1.09E-05 | hsa-miR-768-5p | 0.97 | 0.06 | 0.42 | 0.09 | 1.05 | 0.10 | 0.75 | 0.01 | 0.67 | 0.09 | 0.84 | 0.05 | 0.67 | 0.14 | 0.42 | 0.06 | 0.93 | 0.18 | 0.52 | 0.08 | 0.80 | 0.17 |
| 8.7E-09  | hsa-miR-877    | 2.52 | 0.04 | 1.34 | 0.09 | 3.43 | 0.02 | 1.22 | 0.09 | 0.75 | 0.14 | 1.66 | 0.20 | 2.38 | 0.11 | 1.68 | 0.01 | 3.06 | 0.18 | 2.09 | 0.01 | 1.12 | 0.10 |
| 1.88E-15 | hsa-miR-886-3p | 2.52 | 0.22 | 1.90 | 0.21 | 0.89 | 0.20 | 1.26 | 0.22 | 1.86 | 0.17 | 0.66 | 0.36 | 1.22 | 0.20 | 1.38 | 0.18 | 1.06 | 0.21 | 3.51 | 0.16 | 1.83 | 0.12 |
| 5.88E-11 | hsa-miR-886-5p | 2.10 | 0.08 | 1.07 | 0.15 | 0.95 | 0.21 | 0.82 | 0.08 | 0.94 | 0.21 | 0.69 | 0.09 | 1.04 | 0.09 | 0.99 | 0.07 | 1.07 | 0.24 | 2.36 | 0.08 | 1.35 | 0.01 |
| 3.39E-10 | hsa-miR-888*   | 1.52 | 0.09 | 1.08 | 0.05 | 1.50 | 0.07 | 1.19 | 0.01 | 0.62 | 0.13 | 1.75 | 0.03 | 1.01 | 0.07 | 0.84 | 0.07 | 1.18 | 0.06 | 1.73 | 0.07 | 1.27 | 0.08 |
| 9.01E-16 | hsa-miR-891a   | 2.48 | 0.12 | 1.85 | 0.05 | 2.10 | 0.17 | 1.71 | 0.17 | 2.00 | 0.15 | 1.42 | 0.19 | 1.61 | 0.18 | 1.12 | 0.13 | 2.09 | 0.21 | 3.55 | 0.14 | 1.74 | 0.19 |
| 5.64E-09 | hsa-miR-923    | 2.41 | 0.02 | 2.12 | 0.06 | 2.34 | 0.02 | 1.99 | 0.10 | 2.42 | 0.06 | 1.56 | 0.17 | 2.68 | 0.02 | 2.85 | 0.03 | 2.50 | 0.07 | 1.58 | 0.01 | 2.83 | 0.05 |
| 8.8E-11  | hsa-miR-92a    | 1.07 | 0.01 | 0.65 | 0.05 | 1.17 | 0.03 | 0.54 | 0.04 | 0.41 | 0.03 | 0.66 | 0.04 | 0.92 | 0.07 | 0.58 | 0.03 | 1.27 | 0.12 | 0.84 | 0.00 | 0.87 | 0.04 |
| 4.53E-12 | hsa-miR-92b    | 1.06 | 0.04 | 0.64 | 0.09 | 1.19 | 0.06 | 0.55 | 0.03 | 0.41 | 0.04 | 0.69 | 0.02 | 0.98 | 0.04 | 0.59 | 0.05 | 1.38 | 0.04 | 0.82 | 0.04 | 0.83 | 0.00 |
| 3.4E-15  | hsa-miR-93     | 1.29 | 0.02 | 0.84 | 0.03 | 1.39 | 0.01 | 0.70 | 0.10 | 0.28 | 0.04 | 1.12 | 0.14 | 0.91 | 0.01 | 0.57 | 0.01 | 1.24 | 0.02 | 1.33 | 0.00 | 1.46 | 0.02 |
| 2.86E-18 | hsa-miR-933    | 1.83 | 0.02 | 1.32 | 0.01 | 1.75 | 0.00 | 1.31 | 0.00 | 1.17 | 0.00 | 1.46 | 0.00 | 1.63 | 0.00 | 1.33 | 0.03 | 1.92 | 0.02 | 1.84 | 0.03 | 1.44 | 0.02 |
| 8.27E-12 | hsa-miR-939    | 2.15 | 0.02 | 1.29 | 0.02 | 2.47 | 0.06 | -    | -    | 1.12 | 0.02 | 1.71 | 0.07 | 1.96 | 0.03 | 1.45 | 0.00 | 2.47 | 0.05 | 1.59 | 0.01 | 1.63 | 0.04 |
