# Supplementary material for: Expression Profile of MicroRNAs in Young Stroke Patients
Source: PubMed Central journal article supplement (PMC2765616; doi:10.1371/journal.pone.0007689), 2009-11-02
Supplement: pone.0007689.s002.pdf [file pone.0007689.s002.pdf]

| miRNA           | Stroke | Stroke |       | LA   |       | CEmb | Cemb  |       | SA   | UND  |       |
|-----------------|--------|--------|-------|------|-------|------|-------|-------|------|------|-------|
|                 |        | mRS<2  | mRS>2 | LA   | mRS<2 |      | mRS>2 | mRS<2 |      |      | mRS>2 |
| hsa-let-7a      | 0.76   | 0.33   | 0.71  | 0.39 | 0.13  | 0.65 | 0.38  | 0.18  | 0.57 | 0.68 | 1.01  |
| hsa-let-7b      | 1.23   | 0.58   | 1.30  | 0.51 | 0.27  | 0.75 | 0.87  | 0.51  | 1.23 | 1.13 | 1.12  |
| hsa-let-7c      | 1.18   | 0.59   | 1.29  | 0.55 | 0.29  | 0.81 | 0.85  | 0.52  | 1.19 | 1.10 | 1.12  |
| hsa-let-7d      | 0.75   | 0.39   | 0.82  | 0.46 | 0.16  | 0.76 | 0.42  | 0.19  | 0.64 | 0.70 | 1.08  |
| hsa-let-7d*     | 1.59   | 0.67   | 1.68  | 0.77 | 0.36  | 1.18 | 1.21  | 0.83  | 1.59 | 1.02 | 0.86  |
| hsa-let-7g      | 0.93   | 0.44   | 0.88  | 0.45 | 0.13  | 0.77 | 0.44  | 0.24  | 0.64 | 0.73 | 1.24  |
| hsa-let-7i      | 0.91   | 0.44   | 0.84  | 0.49 | 0.12  | 0.86 | 0.44  | 0.20  | 0.67 | 0.83 | 1.33  |
| hsa-miR-101     | 1.54   | 0.87   | 1.47  | 0.83 | 0.31  | 1.34 | 0.88  | 0.54  | 1.22 | 1.98 | 2.05  |
| hsa-miR-103     | 1.31   | 0.82   | 1.40  | 0.84 | 0.27  | 1.41 | 0.93  | 0.64  | 1.21 | 1.64 | 1.43  |
| hsa-miR-106a    | 1.49   | 1.02   | 1.51  | 0.84 | 0.22  | 1.45 | 0.84  | 0.50  | 1.18 | 1.77 | 1.82  |
| hsa-miR-106b    | 1.42   | 0.90   | 1.51  | 0.77 | 0.23  | 1.31 | 1.02  | 0.68  | 1.35 | 1.77 | 1.39  |
| hsa-miR-106b*   | 1.42   | 0.73   | 1.52  | 0.80 | 0.36  | 1.25 | 1.03  | 0.75  | 1.31 | 1.37 | 1.30  |
| hsa-miR-107     | 1.17   | 0.64   | 1.22  | 0.76 | 0.22  | 1.30 | 0.72  | 0.51  | 0.92 | 1.37 | 1.29  |
| hsa-miR-1255a   | 1.03   | 0.68   | 1.25  | 0.73 | 0.58  | 0.87 | 0.90  | 0.59  | 1.21 | 0.95 | 1.11  |
| hsa-miR-125b-1* | 1.98   | 1.29   | 2.58  | 1.15 | 0.96  | 1.33 | 2.07  | 1.00  | 3.14 | 1.90 | 1.70  |
| hsa-miR-1264    | 1.53   | 1.03   | 1.87  | 1.03 | 0.32  | 1.74 | 1.21  | 0.76  | 1.65 | 1.64 | 1.49  |
| hsa-miR-1265    | 1.36   | 0.75   | 1.20  | 0.99 | 0.70  | 1.28 | 1.00  | 0.80  | 1.20 | 1.13 | 1.18  |
| hsa-miR-1280    | 1.99   | 1.67   | 2.14  | 1.10 | 0.96  | 1.24 | 1.72  | 1.47  | 1.98 | 2.22 | 2.09  |
| hsa-miR-1284    | 1.01   | 0.59   | 1.07  | 0.66 | 0.48  | 0.84 | 0.66  | 0.37  | 0.95 | 0.84 | 0.94  |
| hsa-miR-1285    | 1.87   | 1.22   | 1.68  | 1.34 | 1.54  | 1.14 | 1.37  | 1.04  | 1.70 | 1.30 | 1.39  |
| hsa-miR-1290    | 2.01   | 1.70   | 1.98  | 2.14 | 2.71  | 1.57 | 2.27  | 2.20  | 2.33 | 1.37 | 2.27  |
| hsa-miR-129-5p  | 1.73   | 1.13   | 2.07  | 1.00 | 0.93  | 1.07 | 1.95  | 1.00  | 2.89 | 1.52 | 1.54  |
| hsa-miR-1308    | 1.03   | 0.57   | 0.98  | 0.90 | 0.77  | 1.03 | 0.75  | 0.64  | 0.86 | 0.63 | 0.67  |
| hsa-miR-130a    | 1.56   | 0.80   | 1.64  | 0.99 | 0.30  | 1.69 | 0.92  | 0.62  | 1.21 | 1.70 | 1.35  |
| hsa-miR-130b    | 1.78   | 1.17   | 1.90  | 0.89 | 0.30  | 1.47 | 1.35  | 1.06  | 1.65 | 2.33 | 1.84  |
| hsa-miR-138-1*  | 1.20   | 0.94   | 1.20  | 0.93 | 0.35  | 1.51 | 0.98  | 0.66  | 1.29 | 1.43 | 1.20  |
| hsa-miR-140-3p  | 1.29   | 0.76   | 1.20  | 0.72 | 0.29  | 1.15 | 0.89  | 0.73  | 1.05 | 1.12 | 0.99  |
| hsa-miR-142-5p  | 1.42   | 0.86   | 1.32  | 0.80 | 0.27  | 1.32 | 0.85  | 0.55  | 1.14 | 1.24 | 1.54  |
| hsa-miR-144     | 1.35   | 0.87   | 1.61  | 0.85 | 0.42  | 1.28 | 1.17  | 0.65  | 1.70 | 1.70 | 1.57  |
| hsa-miR-144*    | 0.69   | 1.30   | 0.71  | 0.60 | 0.06  | 1.14 | 0.32  | 0.05  | 0.59 | 1.07 | 1.43  |
| hsa-miR-148b    | 1.24   | 0.70   | 1.24  | 0.56 | 0.16  | 0.95 | 0.77  | 0.50  | 1.04 | 0.91 | 1.16  |
| hsa-miR-149*    | 1.68   | 1.01   | 2.25  | 1.18 | 0.78  | 1.58 | 1.94  | 0.99  | 2.89 | 1.21 | 1.38  |
| hsa-miR-150     | 2.22   | 0.69   | 1.62  | 0.61 | 0.50  | 0.72 | 0.84  | 0.52  | 1.16 | 1.01 | 1.62  |
| hsa-miR-151-3p  | 2.38   | 1.34   | 2.48  | 1.00 | 0.29  | 1.70 | 1.71  | 1.08  | 2.34 | 2.65 | 2.40  |
| hsa-miR-151-5p  | 1.47   | 0.84   | 1.33  | 0.75 | 0.12  | 1.38 | 0.66  | 0.28  | 1.04 | 1.56 | 1.78  |
| hsa-miR-15a     | 1.07   | 0.57   | 1.18  | 0.63 | 0.24  | 1.03 | 0.66  | 0.36  | 0.96 | 1.21 | 1.29  |
| hsa-miR-16      | 1.02   | 0.62   | 1.03  | 0.67 | 0.30  | 1.03 | 0.74  | 0.46  | 1.02 | 1.03 | 1.01  |
| hsa-miR-16-2*   | 1.42   | 0.70   | 1.82  | 0.84 | 0.09  | 1.60 | 1.01  | 0.38  | 1.61 | 1.38 | 1.82  |
| hsa-miR-17      | 1.26   | 0.79   | 1.26  | 0.72 | 0.19  | 1.26 | 0.67  | 0.41  | 0.94 | 1.48 | 1.47  |
| hsa-miR-17*     | 2.02   | 0.84   | 1.80  | 0.73 | 0.29  | 1.15 | 1.41  | 0.94  | 1.88 | 1.63 | 1.70  |
| hsa-miR-182     | 1.35   | 0.59   | 1.13  | 0.48 | 0.09  | 0.86 | 0.68  | 0.46  | 0.89 | 1.37 | 1.39  |
| hsa-miR-1826    | 1.01   | 0.61   | 0.97  | 0.91 | 0.89  | 0.94 | 0.74  | 0.59  | 0.89 | 0.71 | 0.88  |
| hsa-miR-1827    | 1.24   | 0.72   | 1.15  | 0.85 | 0.76  | 0.94 | 1.03  | 0.91  | 1.15 | 0.82 | 1.23  |
| hsa-miR-183     | 1.32   | 0.78   | 1.14  | 0.54 | 0.23  | 0.84 | 0.99  | 0.83  | 1.15 | 1.22 | 1.10  |
| hsa-miR-183*    | 1.88   | 0.96   | 2.27  | 1.02 | 0.84  | 1.20 | 1.83  | 0.76  | 2.89 | 1.59 | 1.34  |
| hsa-miR-184     | 1.93   | 1.75   | 2.82  | 1.33 | 0.99  | 1.67 | 2.29  | 1.45  | 3.14 | 2.43 | 2.16  |
| hsa-miR-185     | 1.78   | 0.91   | 1.90  | 0.93 | 0.25  | 1.62 | 1.10  | 0.92  | 1.28 | 1.54 | 1.39  |
| hsa-miR-185*    | 2.15   | 1.15   | 2.93  | 1.03 | 0.82  | 1.25 | 2.32  | 0.95  | 3.70 | 1.42 | 1.75  |
| hsa-miR-18a     | 1.96   | 1.22   | 2.13  | 1.09 | 0.24  | 1.93 | 1.00  | 0.68  | 1.32 | 2.74 | 2.36  |
| hsa-miR-18b     | 1.46   | 1.06   | 1.59  | 0.87 | 0.21  | 1.53 | 0.81  | 0.51  | 1.11 | 1.90 | 1.86  |
| hsa-miR-191     | 1.47   | 0.92   | 1.47  | 0.70 | 0.32  | 1.09 | 1.06  | 0.87  | 1.25 | 1.34 | 1.33  |
| hsa-miR-194     | 1.79   | 0.84   | 1.93  | 0.87 | 0.20  | 1.53 | 1.05  | 0.76  | 1.34 | 1.64 | 1.39  |
| hsa-miR-195     | 1.06   | 0.27   | 1.01  | 0.45 | 0.08  | 0.82 | 0.45  | 0.16  | 0.73 | 1.32 | 1.24  |
| hsa-miR-19a     | 1.41   | 0.81   | 1.33  | 0.82 | 0.30  | 1.35 | 0.87  | 0.51  | 1.22 | 1.23 | 1.49  |

|                |      |      |      |      |      |      |      |      |      |      |      |
|----------------|------|------|------|------|------|------|------|------|------|------|------|
| hsa-miR-19b    | 1.65 | 1.10 | 1.47 | 0.88 | 0.52 | 1.24 | 1.18 | 0.86 | 1.49 | 1.62 | 1.74 |
| hsa-miR-20b    | 1.29 | 0.71 | 1.29 | 0.69 | 0.12 | 1.25 | 0.65 | 0.36 | 0.93 | 1.37 | 1.46 |
| hsa-miR-21     | 1.34 | 0.58 | 1.28 | 0.75 | 0.17 | 1.33 | 0.75 | 0.35 | 1.15 | 1.72 | 1.79 |
| hsa-miR-22     | 1.26 | 0.85 | 1.28 | 0.59 | 0.30 | 0.87 | 1.17 | 1.03 | 1.30 | 0.99 | 1.00 |
| hsa-miR-222    | 1.31 | 0.85 | 1.26 | 0.67 | 0.17 | 1.18 | 0.83 | 0.56 | 1.11 | 1.70 | 1.57 |
| hsa-miR-223    | 1.44 | 0.88 | 1.42 | 0.93 | 0.25 | 1.61 | 0.57 | 0.35 | 0.80 | 1.71 | 1.72 |
| hsa-miR-23a    | 1.63 | 1.21 | 1.37 | 0.86 | 0.37 | 1.36 | 0.80 | 0.61 | 0.97 | 1.78 | 1.94 |
| hsa-miR-23b    | 1.37 | 0.97 | 1.18 | 0.67 | 0.21 | 1.10 | 0.78 | 0.64 | 0.91 | 1.39 | 1.75 |
| hsa-miR-24     | 1.23 | 0.87 | 1.06 | 0.58 | 0.25 | 0.91 | 0.71 | 0.60 | 0.82 | 1.17 | 1.50 |
| hsa-miR-24-1*  | 1.19 | 0.97 | 1.30 | 0.81 | 0.39 | 1.24 | 1.27 | 0.83 | 1.72 | 1.24 | 1.27 |
| hsa-miR-25     | 1.24 | 0.80 | 1.21 | 0.56 | 0.27 | 0.85 | 0.80 | 0.52 | 1.08 | 1.23 | 1.44 |
| hsa-miR-26a    | 1.17 | 0.70 | 1.10 | 0.58 | 0.18 | 0.98 | 0.67 | 0.43 | 0.91 | 1.28 | 1.29 |
| hsa-miR-26b    | 0.97 | 0.47 | 0.92 | 0.57 | 0.19 | 0.94 | 0.48 | 0.28 | 0.68 | 1.00 | 1.19 |
| hsa-miR-299-3p | 2.15 | 1.45 | 1.79 | 1.16 | 1.41 | 0.90 | 1.84 | 1.39 | 2.29 | 1.71 | 1.27 |
| hsa-miR-29a    | 1.40 | 0.85 | 1.48 | 0.75 | 0.28 | 1.22 | 0.96 | 0.64 | 1.29 | 1.34 | 1.42 |
| hsa-miR-29b    | 1.58 | 1.10 | 1.45 | 0.84 | 0.44 | 1.23 | 0.99 | 0.41 | 1.56 | 2.03 | 1.77 |
| hsa-miR-29c    | 2.34 | 1.21 | 2.38 | 1.08 | 0.30 | 1.85 | 1.58 | 1.01 | 2.13 | 3.14 | 2.25 |
| hsa-miR-300    | 1.28 | 0.84 | 1.11 | 0.56 | 0.56 | 0.56 | 1.10 | 0.78 | 1.42 | 1.31 | 1.29 |
| hsa-miR-301a   | 1.56 | 0.88 | 1.63 | 0.97 | 0.20 | 1.74 | 0.81 | 0.47 | 1.15 | 2.05 | 2.07 |
| hsa-miR-30a    | 1.30 | 0.86 | 1.41 | 0.72 | 0.34 | 1.11 | 1.05 | 0.72 | 1.38 | 1.33 | 1.34 |
| hsa-miR-30b    | 0.98 | 0.57 | 1.00 | 0.59 | 0.16 | 1.01 | 0.53 | 0.28 | 0.78 | 1.07 | 1.24 |
| hsa-miR-30c    | 1.29 | 0.73 | 1.17 | 0.66 | 0.17 | 1.16 | 0.64 | 0.39 | 0.89 | 1.30 | 1.53 |
| hsa-miR-30d    | 1.48 | 0.99 | 1.66 | 0.77 | 0.39 | 1.16 | 1.36 | 1.03 | 1.68 | 1.29 | 1.22 |
| hsa-miR-30e    | 1.16 | 0.74 | 1.18 | 0.71 | 0.22 | 1.20 | 0.73 | 0.40 | 1.05 | 1.21 | 1.47 |
| hsa-miR-32*    | 1.04 | 0.48 | 1.15 | 0.66 | 0.54 | 0.78 | 0.75 | 0.56 | 0.95 | 0.77 | 0.76 |
| hsa-miR-320a   | 2.07 | 1.19 | 2.60 | 1.10 | 0.70 | 1.50 | 2.18 | 1.57 | 2.80 | 1.75 | 1.35 |
| hsa-miR-320b   | 1.52 | 0.88 | 1.81 | 0.86 | 0.57 | 1.15 | 1.53 | 1.19 | 1.87 | 1.26 | 1.03 |
| hsa-miR-320c   | 1.39 | 0.73 | 1.77 | 0.78 | 0.47 | 1.09 | 1.40 | 1.00 | 1.79 | 1.04 | 0.84 |
| hsa-miR-320d   | 1.56 | 0.88 | 1.96 | 0.87 | 0.60 | 1.13 | 1.55 | 1.14 | 1.97 | 1.28 | 1.04 |
| hsa-miR-324-5p | 1.26 | 0.43 | 1.14 | 0.44 | 0.15 | 0.73 | 0.65 | 0.46 | 0.83 | 0.84 | 0.70 |
| hsa-miR-326    | 1.31 | 0.96 | 1.24 | 1.00 | 0.68 | 1.31 | 0.74 | 0.49 | 0.99 | 1.63 | 1.33 |
| hsa-miR-331-3p | 1.44 | 0.72 | 1.71 | 0.89 | 0.41 | 1.37 | 1.27 | 0.94 | 1.60 | 1.15 | 0.95 |
| hsa-miR-339-5p | 2.26 | 1.40 | 1.86 | 0.98 | 0.48 | 1.48 | 1.74 | 1.78 | 1.71 | 2.08 | 1.75 |
| hsa-miR-342-3p | 1.29 | 0.66 | 1.13 | 0.65 | 0.15 | 1.15 | 0.56 | 0.36 | 0.75 | 0.83 | 1.39 |
| hsa-miR-34b    | 1.20 | 0.88 | 1.38 | 1.03 | 0.99 | 1.06 | 1.14 | 0.53 | 1.75 | 1.08 | 1.15 |
| hsa-miR-361-5p | 1.58 | 1.06 | 1.79 | 0.88 | 0.23 | 1.52 | 1.23 | 0.88 | 1.54 | 1.80 | 2.05 |
| hsa-miR-362-5p | 1.78 | 0.78 | 1.85 | 0.75 | 0.18 | 1.31 | 1.12 | 0.55 | 1.67 | 1.73 | 1.54 |
| hsa-miR-363    | 1.24 | 0.57 | 1.42 | 0.67 | 0.24 | 1.09 | 0.95 | 0.57 | 1.33 | 1.10 | 1.10 |
| hsa-miR-374a   | 0.93 | 0.50 | 0.96 | 0.66 | 0.16 | 1.16 | 0.47 | 0.25 | 0.68 | 1.00 | 1.11 |
| hsa-miR-378    | 1.43 | 0.82 | 1.30 | 0.63 | 0.25 | 1.01 | 1.14 | 0.96 | 1.31 | 1.22 | 1.23 |
| hsa-miR-423-3p | 1.35 | 0.77 | 1.44 | 0.76 | 0.44 | 1.07 | 1.21 | 1.11 | 1.32 | 0.96 | 0.90 |
| hsa-miR-423-5p | 1.81 | 0.86 | 2.22 | 0.91 | 0.68 | 1.14 | 1.57 | 1.18 | 1.96 | 1.11 | 0.92 |
| hsa-miR-425    | 1.29 | 0.91 | 1.41 | 0.82 | 0.44 | 1.19 | 1.15 | 0.80 | 1.50 | 1.19 | 1.45 |
| hsa-miR-451    | 1.00 | 1.00 | 1.00 | 1.00 | 1.00 | 1.00 | 1.00 | 1.00 | 1.00 | 1.00 | 1.00 |
| hsa-miR-484    | 1.49 | 0.86 | 1.61 | 0.82 | 0.53 | 1.11 | 1.32 | 1.03 | 1.61 | 0.99 | 0.90 |
| hsa-miR-485-3p | 1.53 | 0.78 | 1.74 | 0.98 | 0.34 | 1.62 | 1.43 | 0.78 | 2.08 | 1.00 | 1.65 |
| hsa-miR-486-5p | 1.21 | 1.19 | 1.21 | 1.06 | 0.90 | 1.21 | 1.21 | 1.21 | 1.21 | 1.08 | 1.19 |
| hsa-miR-487b   | 1.27 | 0.79 | 1.32 | 0.76 | 0.17 | 1.34 | 0.99 | 0.64 | 1.34 | 1.62 | 0.90 |
| hsa-miR-491-3p | 1.57 | 1.25 | 1.58 | 1.01 | 0.80 | 1.23 | 1.47 | 1.40 | 1.54 | 1.37 | 1.16 |
| hsa-miR-500    | 2.07 | 1.50 | 2.72 | 1.41 | 0.31 | 2.51 | 1.81 | 1.24 | 2.39 | 2.81 | 3.41 |
| hsa-miR-501-5p | 1.52 | 0.65 | 1.69 | 0.74 | 0.30 | 1.17 | 1.27 | 0.76 | 1.77 | 1.20 | 0.70 |
| hsa-miR-519d   | 1.78 | 1.29 | 2.10 | 1.22 | 0.36 | 2.09 | 1.29 | 1.03 | 1.56 | 2.21 | 1.98 |
| hsa-miR-519e   | 0.63 | 0.59 | 0.90 | 0.78 | 0.58 | 0.97 | 0.43 | 0.30 | 0.57 | 0.93 | 0.76 |
| hsa-miR-519e*  | 2.76 | 2.04 | 3.53 | 2.18 | 1.25 | 3.11 | 2.77 | 1.75 | 3.79 | 3.23 | 2.86 |
| hsa-miR-532-5p | 1.65 | 0.83 | 1.74 | 0.66 | 0.29 | 1.02 | 1.07 | 0.54 | 1.59 | 2.10 | 2.07 |
| hsa-miR-549    | 1.65 | 1.26 | 1.72 | 1.21 | 1.23 | 1.19 | 1.62 | 0.99 | 2.25 | 1.74 | 1.52 |

|                       |             |      |      |      |      |      |      |      |      |      |      |
|-----------------------|-------------|------|------|------|------|------|------|------|------|------|------|
| <b>hsa-miR-550*</b>   | <b>1.37</b> | 0.94 | 1.50 | 0.85 | 0.41 | 1.29 | 1.26 | 1.04 | 1.47 | 1.27 | 1.25 |
| <b>hsa-miR-551b</b>   | <b>1.12</b> | 0.85 | 1.13 | 0.89 | 0.89 | 0.89 | 0.84 | 0.66 | 1.02 | 1.05 | 1.25 |
| <b>hsa-miR-574-5p</b> | <b>1.05</b> | 0.38 | 1.32 | 0.56 | 0.50 | 0.62 | 0.74 | 0.43 | 1.04 | 0.74 | 0.63 |
| <b>hsa-miR-584</b>    | <b>1.87</b> | 1.20 | 2.03 | 1.16 | 0.70 | 1.62 | 1.48 | 0.95 | 2.02 | 2.39 | 1.80 |
| <b>hsa-miR-628-3p</b> | <b>1.67</b> | 0.94 | 2.30 | 0.96 | 0.87 | 1.04 | 2.09 | 0.77 | 3.41 | 1.33 | 1.23 |
| <b>hsa-miR-634</b>    | <b>1.70</b> | 1.49 | 2.31 | 0.94 | 0.57 | 1.31 | 1.41 | 1.00 | 1.81 | 2.72 | 1.87 |
| <b>hsa-miR-637</b>    | <b>2.25</b> | 1.30 | 2.96 | 1.13 | 1.10 | 1.16 | 2.43 | 0.95 | 3.92 | 2.00 | 1.87 |
| <b>hsa-miR-638</b>    | <b>1.52</b> | 1.16 | 2.36 | 1.10 | 1.09 | 1.10 | 2.23 | 0.92 | 3.54 | 1.30 | 1.62 |
| <b>hsa-miR-652</b>    | <b>1.14</b> | 0.66 | 1.30 | 0.71 | 0.43 | 0.99 | 1.03 | 0.72 | 1.33 | 1.01 | 0.88 |
| <b>hsa-miR-668</b>    | <b>1.96</b> | 0.97 | 2.09 | 1.25 | 1.05 | 1.44 | 1.33 | 0.70 | 1.97 | 1.91 | 1.70 |
| <b>hsa-miR-7</b>      | <b>0.81</b> | 0.34 | 0.86 | 0.48 | 0.25 | 0.72 | 0.47 | 0.23 | 0.71 | 0.93 | 1.58 |
| <b>hsa-miR-720</b>    | <b>1.63</b> | 0.91 | 1.51 | 0.96 | 0.65 | 1.27 | 1.15 | 0.93 | 1.36 | 1.27 | 1.11 |
| <b>hsa-miR-744</b>    | <b>1.84</b> | 1.09 | 2.03 | 0.98 | 0.80 | 1.16 | 1.74 | 1.22 | 2.26 | 1.29 | 1.38 |
| <b>hsa-miR-765</b>    | <b>1.33</b> | 0.98 | 1.31 | 0.91 | 0.86 | 0.96 | 1.17 | 1.04 | 1.29 | 1.17 | 1.11 |
| <b>hsa-miR-768-3p</b> | <b>1.49</b> | 0.94 | 1.49 | 1.13 | 1.09 | 1.16 | 1.15 | 0.71 | 1.59 | 0.92 | 1.29 |
| <b>hsa-miR-877</b>    | <b>2.52</b> | 1.34 | 3.43 | 1.22 | 0.75 | 1.66 | 2.38 | 1.68 | 3.06 | 2.09 | 1.12 |
| <b>hsa-miR-886-3p</b> | <b>2.52</b> | 1.90 | 0.89 | 1.26 | 1.86 | 0.66 | 1.22 | 1.38 | 1.06 | 3.51 | 1.83 |
| <b>hsa-miR-886-5p</b> | <b>2.10</b> | 1.07 | 0.95 | 0.82 | 0.94 | 0.69 | 1.04 | 0.99 | 1.07 | 2.36 | 1.35 |
| <b>hsa-miR-888*</b>   | <b>1.52</b> | 1.08 | 1.50 | 1.19 | 0.62 | 1.75 | 1.01 | 0.84 | 1.18 | 1.73 | 1.27 |
| <b>hsa-miR-92a</b>    | <b>1.07</b> | 0.65 | 1.17 | 0.54 | 0.41 | 0.66 | 0.92 | 0.58 | 1.27 | 0.84 | 0.87 |
| <b>hsa-miR-92b</b>    | <b>1.06</b> | 0.64 | 1.19 | 0.55 | 0.41 | 0.69 | 0.98 | 0.59 | 1.38 | 0.82 | 0.83 |
| <b>hsa-miR-93</b>     | <b>1.29</b> | 0.84 | 1.39 | 0.70 | 0.28 | 1.12 | 0.91 | 0.57 | 1.24 | 1.33 | 1.46 |
