# Supplementary material for: Expression Profile of MicroRNAs in Young Stroke Patients
Source: PLoS One. 2009 Nov 2;4(11):e7689. doi: 10.1371/journal.pone.0007689 (PMC2765616; doi:10.1371/journal.pone.0007689)
Supplement: Table S3 — miRNA expression pattern of pooled and individual large artery stroke samples. Individual samples [LA1&2(mRS = 2) and LA(mRS = 3)] miRNA expression values is compared with the pooled sample miRNA profile of the larger artery stroke. The 72 miRNAs listed here correlated to the total miRNA that are differentially altered in the stroke sample. The microRNAs that are expressed in more than 2 fold change are in bold letters. (0.04 MB XLS) [file pone.0007689.s003.xls]

## Sheet: Sheet1
miRNA	Stroke	±SEM	LA	±SEM	LA mRS<2	±SEM	LA mRS>2	±SEM	LA1 (mRS=2)	±SEM	LA2 (mRS=2)	±SEM	LA3 (mRS=3)	±SEM
hsa-let-7b	1.23315	0.0162239	0.512973	0.0920561	0.270051	0.00657033	0.754607	0.12268	1.005	0.109035	1.025	0.0918498	0.833	0.129842
hsa-let-7c	1.1787	0.00194381	0.55027	0.0882571	0.288495	0.01891	0.809884	0.126493	0.983	0.0829158	0.977	0.0648516	0.862	0.107508
hsa-let-7d	0.751172	0.0331089	0.461523	0.137434	0.162688	0.0302197	0.759264	0.160448	0.985	0.0740607	1.065	0.0520282	0.943	0.106184
hsa-let-7d*	1.59375	0.00224953	0.771149	0.0620743	0.357007	0.0372613	1.18308	0.0920928	0.468	0.119762	0.085	0.025468	0.052	0.0657416
hsa-let-7e	3.01876	0.109024	3.08101	0.0209542	3.1214	0.0427746	3.02824	0.0866408	0.605	0.0884213	0.532	0.0347044	0.386	0.0830022
hsa-let-7f	0.692691	0.0462059	0.449851	0.0763355	0.149778	0.0673363	0.749918	0.0781329	0.907	0.0551319	1.043	0.0275385	0.966	0.0922471
hsa-let-7g	0.930475	0.0377259	0.452874	0.0602395	0.134588	0.00589992	0.770828	0.0717954	0.937	0.132821	1.094	0.0274606	0.953	0.12568
hsa-let-7i	0.906155	0.0409172	0.491414	0.0533198	0.118525	0.104673	0.862681	0.0751119	0.91	0.13129	1.127	0.0362832	0.912	0.0297925
hsa-miR-101	1.54476	0.126354	0.829053	0.016976	0.312358	0.132055	1.3433	0.00983717	1.176	0.185462	1.487	0.0650445	4.163	0.14705
hsa-miR-103	1.31258	0.00302099	0.838459	0.114704	0.267149	0.0458033	1.40904	0.127777	1.367	0.148385	1.065	0.06207	1.483	0.15886
hsa-miR-106a	1.48804	0.117531	0.838846	0.093783	0.224754	0.0755556	1.4529	0.0966028	0.984	0.148834	1.371	0.0498507	1.568	0.132863
hsa-miR-106b	1.41573	0.141683	0.772237	0.164069	0.232707	0.120482	1.31152	0.171805	1.038	0.1201	1.992	0.00807008	2.417	0.0799412
hsa-miR-107	1.16643	0.0461279	0.758635	0.0647162	0.215178	0.076693	1.30208	0.0627369	1.339	0.0985033	0.968	0.023806	1.347	0.0879582
hsa-miR-126	0.788646	0.0242589	0.496405	0.0716221	0.156575	0.0210364	0.836006	0.0811	1.194	0.0164215	1.355	0.0137508	1.415	0.00936059
hsa-miR-130a	1.55876	0.0571715	0.994064	0.0922299	0.297187	0.0935737	1.69094	0.0919937	1.037	0.085462	1.249	0.0596896	2.652	0.114815
hsa-miR-140-3p	1.28956	0.0230054	0.721014	0.0179741	0.292911	0.0124184	1.14895	0.0257234	1.184	0.0803575	1.256	0.00103588	1.517	0.0641827
hsa-miR-144	1.34744	0.0808959	0.850392	0.0247278	0.420905	0.0639577	1.27946	0.0118196	0.581	0.141915	2.101	0.108214	8.081	0.0177257
hsa-miR-144*	0.68851	0.0639119	0.599644	0.0596433	0.0554544	0.0186545	1.14366	0.0634436	0.862	0.141448	1.713	0.0813705	1.813	0.0633542
hsa-miR-149*	1.67502	0.106167	1.18071	0.0854009	0.784377	0.10485	1.57682	0.0757254	0.99	0.0423102	0.367	0.0226046	0.096	0.00783323
hsa-miR-150	2.22485	0.341029	0.610128	0.0974658	0.49831	0.205587	0.717196	0.0222705	2.38	0.0264581	1.306	0.0135798	0.88	0.0323659
hsa-miR-151-5p	1.47232	0.290288	0.753395	0.148581	0.118806	0.485086	1.38089	0.119105	1.154	0.0256725	1.576	0.0193209	1.455	0.0147883
hsa-miR-15a	1.07011	0.0134746	0.633306	0.0702324	0.238881	0.00441682	1.02694	0.0876115	1.069	0.010658	1.398	0.00751349	1.59	0.0503215
hsa-miR-15b	0.94255	0.005198	0.589057	0.0365335	0.476348	0.0885036	0.700728	0.00119644	1.069	0.0197659	0.994	0.0169345	1.005	0.051445
hsa-miR-16	1.02363	0.0234981	0.665158	0.0154591	0.301409	0.0294	1.02853	0.0286088	1.113	0.0487852	1.223	0.0163046	1.701	0.0958719
hsa-miR-17	1.26365	0.0130873	0.724932	0.0512059	0.186466	0.00778163	1.2632	0.0576179	0.997	0.0669801	1.381	0.00423014	1.644	0.0799044
hsa-miR-181a	1.64329	0.0389173	1.14236	0.036818	1.06064	0.0182531	1.22375	0.0529085	1.421	0.0661873	4.25	0.0344293	2.748	0.0390382
hsa-miR-182	1.34708	0.0963352	0.475188	0.102001	0.0921691	0.0460445	0.858054	0.108015	2.039	0.011679	2.069	0.0294681	1.226	0.0122609
hsa-miR-183	1.31895	0.00568263	0.538947	0.03691	0.233919	0.0973692	0.841379	0.0743416	2.351	0.00467594	2.358	0.011285	1.742	0.0370378
hsa-miR-185	1.78268	0.0268306	0.933659	0.0435212	0.246665	0.0341349	1.61983	0.0553577	1.213	0.0452335	1.146	0.0513596	1.165	0.0604824
hsa-miR-18a	1.95952	0.0734001	1.08654	0.265684	0.240015	0.0866095	1.9289	0.288079	1.017	0.0109533	1.461	0.0244342	2.158	0.0279433
hsa-miR-18b	1.45566	0.0387581	0.870612	0.105844	0.209595	0.0349698	1.53105	0.115555	0.953	0.0621736	1.552	0.071152	2.806	0.0720301
hsa-miR-191	1.46996	0.126648	0.704448	0.0100034	0.316039	0.139994	1.08954	0.0277961	1.209	0.0566577	1.238	0.0121567	1.284	0.0400283
hsa-miR-194	1.78688	0.00309423	0.870506	0.172364	0.204741	0.0526969	1.53059	0.20271	1.159	0.0150853	1.63	0.0405048	2.799	0.0265692
hsa-miR-195	1.05584	0.0557114	0.445361	0.105045	0.0750664	0.170262	0.815487	0.0990379	0.682	0.0108953	0.873	0.0215392	1.046	0.0562751
hsa-miR-19a	1.41228	0.0296334	0.824967	0.012575	0.296118	0.00133263	1.35379	0.0150342	1	0.252739	1.3	0.0415968	19.068	0.0195376
hsa-miR-19b	1.65129	0.095992	0.880371	0.138512	0.516143	0.0631606	1.2426	0.169835	1.203	0.101723	1.008	0.0497376	3.143	0.047065
hsa-miR-20a	0.951348	0.102371	0.452427	0.176952	0.177374	0.0872687	0.726626	0.198871	0.972	0.0278254	1.368	0.0118065	1.593	0.0279543
hsa-miR-20b	1.28667	0.0871297	0.686944	0.142063	0.119359	0.0447383	1.25393	0.151342	0.883	0.0223554	1.305	0.0156173	1.412	0.0503052
hsa-miR-21	1.33696	0.143317	0.754026	0.00451487	0.173929	0.173001	1.33143	0.0175934	0.882	0.0344735	1.495	0.0211233	1.475	0.0330857
hsa-miR-22	1.26121	0.00576151	0.585726	0.0520667	0.304691	0.0201461	0.86656	0.063292	1.153	0.0097606	1.96	0.0301243	2.806	0.039213
hsa-miR-222	1.30827	0.0981523	0.674386	0.060923	0.166719	0.044635	1.18203	0.0632205	1.357	0.0646916	1.677	0.00123623	2.169	0.0434486
hsa-miR-223	1.44292	0.0373353	0.929879	0.0647385	0.253467	0.0139498	1.60542	0.077174	2.802	0.019135	2.159	0.0440274	1.884	0.0607274
hsa-miR-23a	1.62948	0.000873823	0.864467	0.0207116	0.37318	0.0270383	1.35575	0.0189701	1.394	0.0265783	1.552	0.0110938	1.376	0.0980814
hsa-miR-23b	1.36882	0.0464461	0.67376	0.092178	0.213428	0.42395	1.10044	0.196424	1.75	0.015492	1.896	0.00974699	1.671	0.0453733
hsa-miR-24	1.23346	0.10445	0.582286	0.164984	0.254942	0.038884	0.907129	0.200507	2.803	0.0712871	2.855	0.0567646	2.874	0.101592
hsa-miR-25	1.24286	0.0613668	0.561952	0.0991147	0.267552	0.0228525	0.853834	0.137416	0.938	0.0377397	0.879	0.0336714	0.83	0.017677
hsa-miR-26a	1.16879	0.00102821	0.581783	0.078773	0.182643	0.0411863	0.979423	0.101193	0.869	0.033152	1.279	0.0153172	1.067	0.00398689
hsa-miR-26b	0.971067	0.208277	0.566212	0.00125285	0.190453	0.233098	0.936014	0.0463112	0.646	0.0510461	1.373	0.0179204	1.051	0.0210451
hsa-miR-29b	1.58425	0.0358858	0.835327	0.0210788	0.442151	0.0630828	1.22799	0.00595111	0.692	0.0316842	2.732	0.0510425	5.963	0.0174689
hsa-miR-29c	2.3364	0.011147	1.07994	0.0879266	0.304915	0.00492018	1.8535	0.103221	1.312	0.0836602	2.373	0.0273608	7.312	0.0291479
hsa-miR-30a	1.30478	0.0465321	0.72361	0.0854946	0.338888	0.040152	1.10789	0.0993683	0.459	0.0960621	0.189	0.00282631	0.257	0.0739053
hsa-miR-30b	0.984297	0.031357	0.587098	0.0122925	0.164131	0.0239396	1.01005	0.0103999	0.772	0.0508727	1.565	0.0155504	1.762	0.0550682
hsa-miR-30c	1.28869	0.10021	0.664081	0.0392267	0.165991	0.102336	1.16181	0.0302044	1.143	0.0854836	1.695	0.0162534	1.437	0.0937163
hsa-miR-30d	1.48136	0.0469304	0.774197	0.0259022	0.388956	0.0706162	1.15711	0.0583891	0.623	0.0346333	0.288	0.00925894	0.384	0.0821481
hsa-miR-30e	1.16314	0.00233817	0.708068	0.0497725	0.216066	0.0126571	1.19959	0.0610239	0.446	0.0771142	0.567	0.0157495	1.31	0.0749005
hsa-miR-320a	2.06943	0.109185	1.1001	0.012062	0.698545	0.107341	1.49718	0.0324434	0.932	0.0347264	0.56	0.00526812	0.504	0.0505566
hsa-miR-324-5p	1.25502	0.179182	0.439978	0.350842	0.149702	0.35495	0.730253	0.35	1.716	0.0407536	1.263	0.0577399	1.252	0.00634386
hsa-miR-331-3p	1.4362	0.0511034	0.893393	0.195559	0.414387	0.0303616	1.36529	0.245898	1.2	0.0273758	0.804	0.0301535	0.634	0.0392347
hsa-miR-363	1.23691	0.183755	0.666404	0.0165904	0.238834	0.204348	1.0871	0.0654917	0.682	0.0139134	1.901	0.0203485	2.249	0.0253768
hsa-miR-423-3p	1.34554	0.00811646	0.756277	0.0461481	0.439257	0.0192889	1.07308	0.0571438	1.157	0.0669459	0.496	0.00321762	0.323	0.0925763
hsa-miR-425	1.29354	0.0437392	0.818536	0.0520056	0.443677	0.0288183	1.19324	0.0606278	1.349	0.0500627	1.165	0.0136221	1.437	0.0304198
hsa-miR-451	1.00034	6.62128e-05	1.00026	2.72777e-05	1.00042	6.62154e-05	1.00009	1.16728e-05	1.017	0.071621	1.338	0.0145144	1.698	0.0627859
hsa-miR-484	1.49434	0.0210168	0.822398	0.059734	0.530353	0.0586296	1.11444	0.0602596	0.799	0.000388716	0.522	0.0108167	0.387	0.0359866
hsa-miR-486-5p	1.20852	0.0173853	1.05616	2.41272e-05	0.903664	0.0233732	1.20824	0.0174398	0.995	0.0250899	0.848	0.0346463	0.863	0.01277
hsa-miR-638	1.51817	0.147255	1.09906	0.248457	1.08541	0.150916	1.10285	0.34446	0.997	0.0593208	0.513	0.032514	0.277	0.0310067
hsa-miR-652	1.14465	0.0690029	0.707002	0.158408	0.425815	0.0693028	0.985861	0.196934	0.782	0.054616	0.504	0.0221442	0.426	0.00404567
hsa-miR-768-3p	1.49147	0.0120606	1.12941	0.0567445	1.09414	0.013327	1.15967	0.122862	1.509	0.106089	0.771	0.0107222	0.363	0.148812
hsa-miR-768-5p	0.969034	0.0550473	0.753945	0.0125184	0.666999	0.0874132	0.83766	0.0471372	1.292	0.0685074	0.386	0.0437877	0.183	0.0504718
hsa-miR-923	2.40665	0.0234454	1.99079	0.100793	2.42005	0.0571179	1.55587	0.168698	0.578	0.0425756	0.658	0.01776	0.101	0.028556
hsa-miR-92a	1.07155	0.00528307	0.535991	0.0375117	0.409812	0.0332911	0.662164	0.0401238	1.004	0.0806518	0.874	0.0366539	0.889	0.0362119
hsa-miR-92b	1.05832	0.0404151	0.548299	0.0273323	0.40605	0.0429327	0.690473	0.0181579	0.993	0.0766156	0.725	0.00165446	0.66	0.0588009
hsa-miR-93	1.28991	0.0150765	0.702335	0.104457	0.279321	0.0391034	1.12189	0.14031	1.047	0.0785091	1.346	0.0171101	1.597	0.0716774
